# Supplementary material
Source: PubMed Central journal article supplement (PMC6826518)
Supplement: Supplemental_Material2.pdf [file Supplemental_Material2.pdf]

## Supplementary Tables

**Supplementary Table 1.** Clinical outcomes: percentage of patients (number)

|                                               | Overall   | CD        | UC        | p    |
|-----------------------------------------------|-----------|-----------|-----------|------|
| Clinical remission at week 14                 | 32.7 (33) | 30.9 (13) | 33.8 (20) | 0.76 |
| Clinical remission at week 14 plus normal CRP | 17.8 (18) | 23.8 (10) | 13.5 (8)  | 0.18 |
| Clinical remission at week 22                 | 35.7 (36) | 35.7 (15) | 35.6 (21) | 0.99 |
| Clinical remission at week 22 plus normal CRP | 22.8 (23) | 21.4 (9)  | 33.3 (14) | 0.78 |
| Clinical remission at week 54                 | 40.6 (41) | 52.4 (22) | 45.2 (19) | 0.04 |
| Clinical remission at week 54 plus normal CRP | 21.8 (22) | 26.2 (11) | 26.2 (11) | 0.36 |
| Mucosal healing*                              | 39 (23)   | 36.8 (7)  | 41 (16)   | 0.75 |

\*MH data are referred to patients having both baseline and follow-up endoscopy

**Supplementary Table 2.** Association between Median Week 6 VTL and clinical and endoscopic outcomes for UC patients (MH=mucosal healing).

|                                                    | <b>Median W6<br/>VTL, µg/ml</b> | <b>IQR</b> |                                                       | <b>Median W6<br/>VTL, µg/ml</b> | <b>IQR</b> | <b>p</b>    |
|----------------------------------------------------|---------------------------------|------------|-------------------------------------------------------|---------------------------------|------------|-------------|
| <b>W14 remitters</b>                               | 31                              | 23.8-43.7  | <b>W14 non-remitters</b>                              | 20.3                            | 14.9-28.8  | <b>0.05</b> |
| <b>W22 remitters</b>                               | 29.4                            | 20.3-42.6  | <b>W22 non-remitters</b>                              | 19.8                            | 14.8-28.6  | <b>0.05</b> |
| <b>W54 remitters</b>                               | 27.9                            | 16.4-41.2  | <b>W54 non-remitters</b>                              | 27.2                            | 19.2-35.6  | 0.27        |
| <b>MH at W54</b>                                   | 24.6                            | 14.8-39.4  | <b>No MH at W54</b>                                   | 27.4                            | 15.9-38.3  | 0.66        |
| <b>MH at W54<br/>(with baseline<br/>endoscopy)</b> | 26.6                            | 15-36.9    | <b>No MH at W54<br/>(with baseline<br/>endoscopy)</b> | 27.4                            | 15.9-38.3  | 0.71        |

**Supplementary Table 3.** Association between Median Week 6 VTL and clinical and endoscopic outcomes for CD patients.

|                                                    | <b>Median W6<br/>VTL, µg/ml</b> | <b>IQR</b> |                                                       | <b>Median W6<br/>VTL, µg/ml</b> | <b>IQR</b> | <b>p</b>     |
|----------------------------------------------------|---------------------------------|------------|-------------------------------------------------------|---------------------------------|------------|--------------|
| <b>W14 remitters</b>                               | 34.2                            | 27.8-55.4  | <b>W14 non-remitters</b>                              | 29                              | 19.1-42.3  | 0.16         |
| <b>W22 remitters</b>                               | 34.2                            | 29.8-58.6  | <b>W22 non-remitters</b>                              | 28.7                            | 18.2-41.3  | 0.08         |
| <b>W54 remitters</b>                               | 30.9                            | 20.7-53.5  | <b>W54 non-remitters</b>                              | 25.4                            | 19.7-32.4  | 0.4          |
| <b>MH at W54</b>                                   | 50                              | 27.4-53.6  | <b>No MH at W54</b>                                   | 26.4                            | 16.5-37.5  | 0.11         |
| <b>MH at W54<br/>(with baseline<br/>endoscopy)</b> | 53                              | 34.8-53.7  | <b>No MH at W54<br/>(with baseline<br/>endoscopy)</b> | 24.5                            | 16.5-32.2  | <b>0.006</b> |

**Supplementary Table 4.** Association between Median Week 14 VTL and clinical and endoscopic outcomes for UC patients.

|                                            | <b>Median W14 VTL, µg/ml</b> | <b>IQR</b> |                                               | <b>Median W14 VTL, µg/ml</b> | <b>IQR</b> | <b>p</b>          |
|--------------------------------------------|------------------------------|------------|-----------------------------------------------|------------------------------|------------|-------------------|
| <b>W14 remitters</b>                       | 22.3                         | 18.3-25    | <b>W14 non-remitters</b>                      | 13.2                         | 6.6-19     | <b>&lt;0.0001</b> |
| <b>W22 remitters</b>                       | 21.7                         | 18.9-26.8  | <b>W22 non-remitters</b>                      | 11                           | 4.6-17.3   | <b>&lt;0.0001</b> |
| <b>W54 remitters</b>                       | 20.4                         | 17-27.8    | <b>W54 non-remitters</b>                      | 14.3                         | 7.6-17.7   | <b>0.02</b>       |
| <b>MH at W54</b>                           | 22.4                         | 17.2-25    | <b>No MH at W54</b>                           | 12.5                         | 7.9-17.5   | <b>0.006</b>      |
| <b>MH at W54 (with baseline endoscopy)</b> | 21                           | 17-24.6    | <b>No MH at W54 (with baseline endoscopy)</b> | 12.5                         | 7.2-17.3   | <b>0.004</b>      |

**Supplementary Table 5.** Association between Median Week 14 VTL and clinical and endoscopic outcomes for CD patients.

|                                                    | <b>Median W14<br/>VTL, µg/ml</b> | <b>IQR</b> |                                                       | <b>Median W14<br/>VTL, µg/ml</b> | <b>IQR</b> | <b>p</b>    |
|----------------------------------------------------|----------------------------------|------------|-------------------------------------------------------|----------------------------------|------------|-------------|
| <b>W14 remitters</b>                               | 24.2 (12)                        | 18-40.4    | <b>W14 non-remitters</b>                              | 19.7 (23)                        | 12.2-37.2  | 0.19        |
| <b>W22 remitters</b>                               | 27.4 (13)                        | 18.3-39    | <b>W22 non-remitters</b>                              | 18.4 (20)                        | 12.6-36.7  | 0.17        |
| <b>W54 remitters</b>                               | 24.2 (18)                        | 16.8-37.7  | <b>W54 non-remitters</b>                              | 16.3 (5)                         | 9.2-41     | 0.33        |
| <b>MH at W54</b>                                   | 20.9 (7)                         | 17.3-41.4  | <b>No MH at W54</b>                                   | 15.7 (15)                        | 10.5-28.1  | 0.14        |
| <b>MH at W54<br/>(with baseline<br/>endoscopy)</b> | 18.6 (5)                         | 16-47.6    | <b>No MH at W54<br/>(with baseline<br/>endoscopy)</b> | 11.9 (11)                        | 8.1-18.8   | <b>0.05</b> |
